# Supplementary material for: De Novo Characterization of Flower Bud Transcriptomes and the Development of EST-SSR Markers for the Endangered Tree Tapiscia sinensis
Source: MDPI journal article supplement (doi:10.3390/ijms160612855), 2015-06-05
Supplement: s1 [file s1]

# Supplementary Information

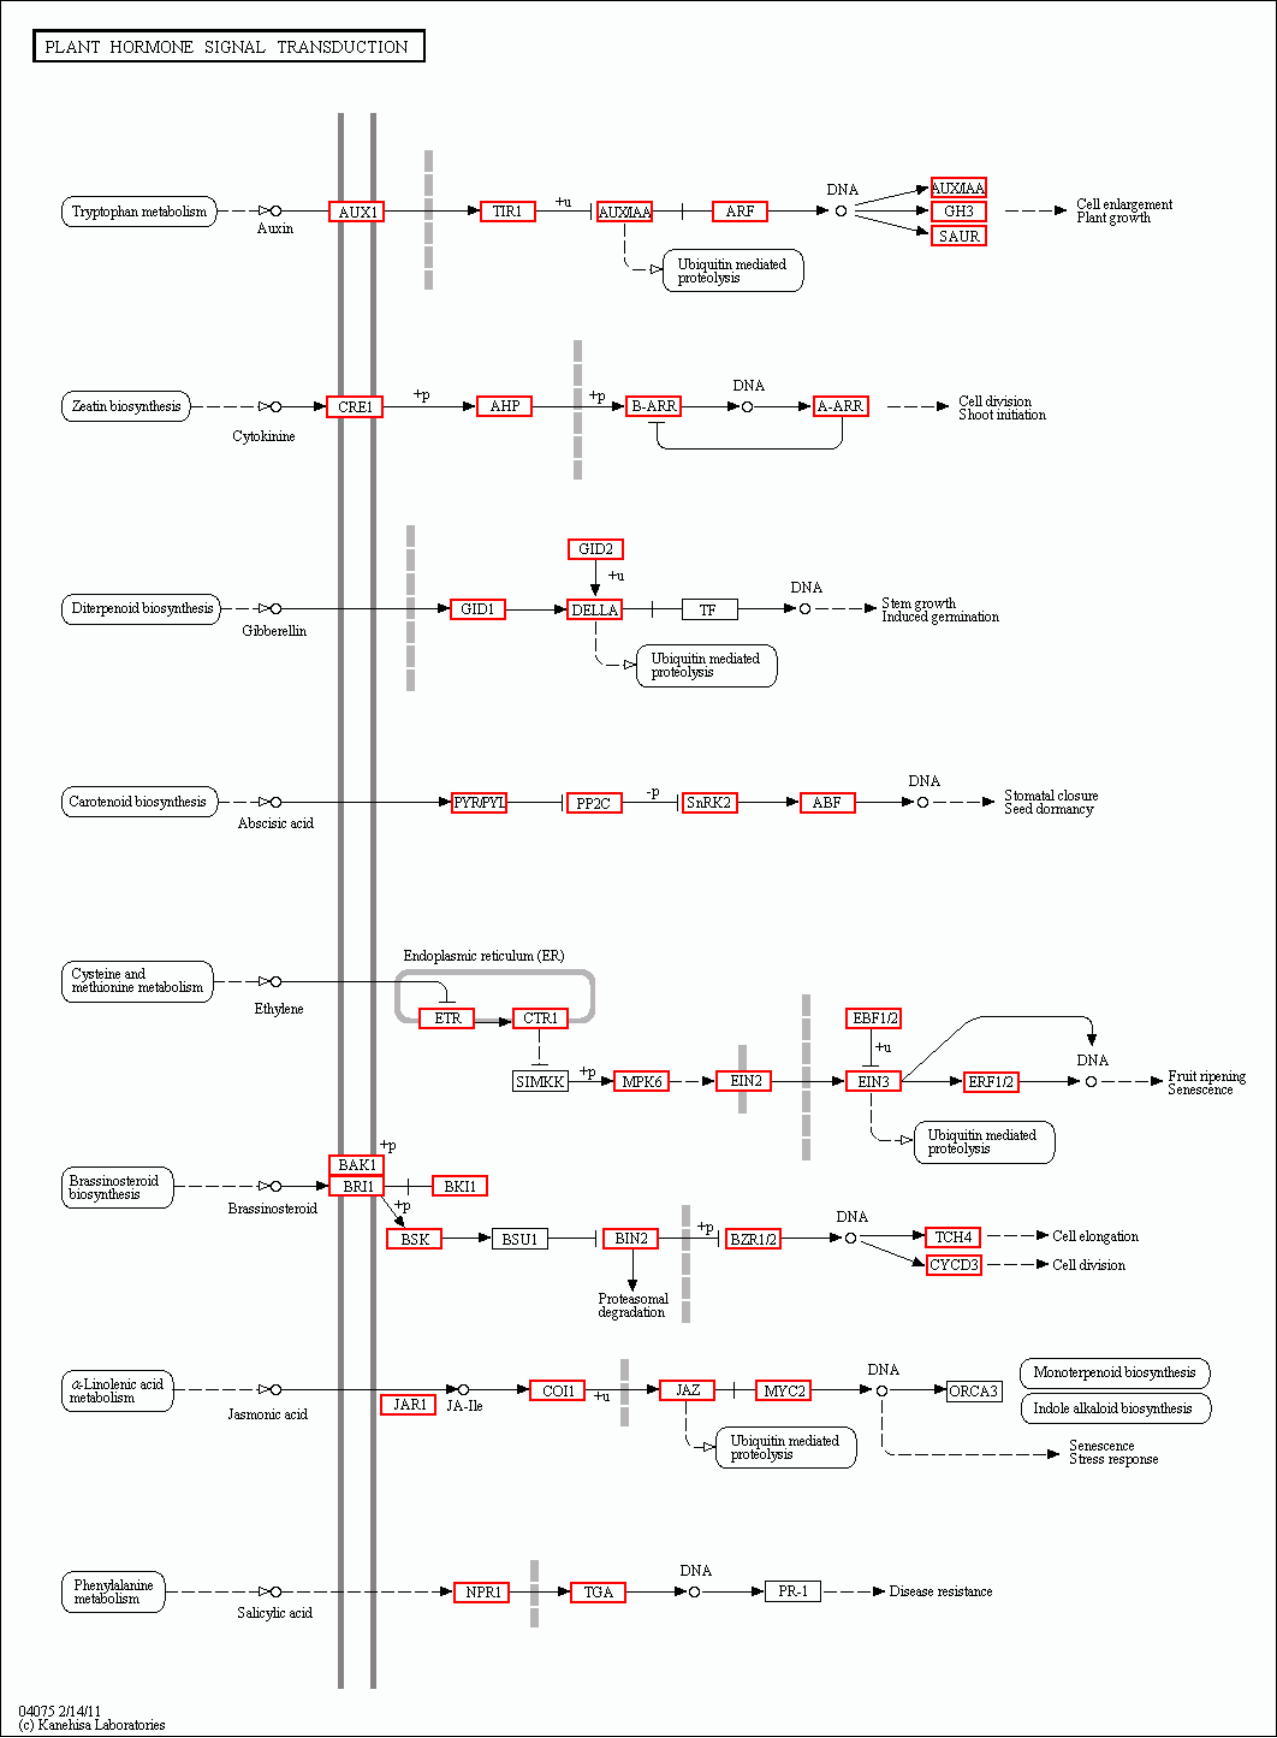

**Figure S1.** Unigenes were in the “Plant hormone signal transduction” pathways.

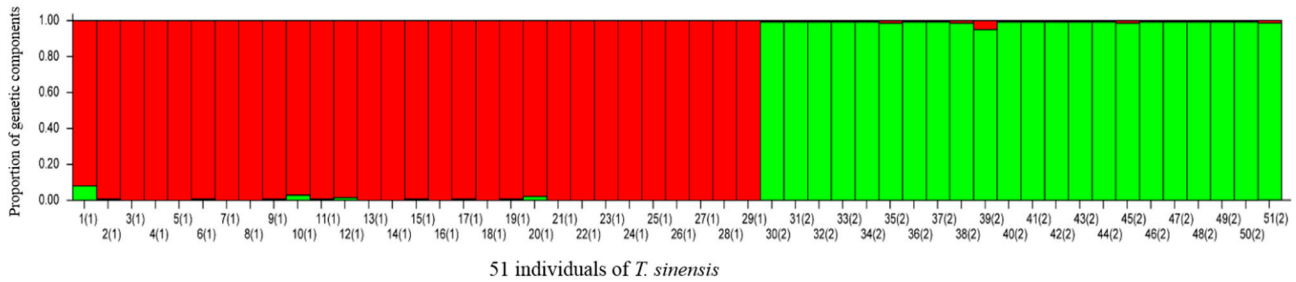

**Figure S2.** Bayesian clustering analysis of the 51 individuals was constructed based on the six polymorphic SSR markers. Red means genetic cluster in Wuling Mountains; Green means genetic cluster in Qinling Mountains. Individuals 1 to 29 were from Wuling Mountains while individuals 30 to 51 were from Qinling Mountains.

**Table S1.** Unigenes were assigned to 124 pathways.

| Number | Pathway                                        | All Genes with Pathway Annotation<br>(10002) | Pathway ID |
|--------|------------------------------------------------|----------------------------------------------|------------|
| 1      | Metabolic pathways                             | 2587 (25.86%)                                | ko01100    |
| 2      | Biosynthesis of secondary metabolites          | 1263 (12.63%)                                | ko01110    |
| 3      | Ribosome                                       | 337 (3.37%)                                  | ko03010    |
| 4      | Spliceosome                                    | 313 (3.13%)                                  | ko03040    |
| 5      | RNA transport                                  | 273 (2.73%)                                  | ko03013    |
| 6      | Protein processing in<br>endoplasmic reticulum | 263 (2.63%)                                  | ko04141    |
| 7      | Plant hormone signal transduction              | 260 (2.6%)                                   | ko04075    |
| 8      | Purine metabolism                              | 259 (2.59%)                                  | ko00230    |
| 9      | Oxidative phosphorylation                      | 233 (2.33%)                                  | ko00190    |
| 10     | Starch and sucrose metabolism                  | 224 (2.24%)                                  | ko00500    |
| 11     | Plant-pathogen interaction                     | 217 (2.17%)                                  | ko04626    |
| 12     | Ribosome biogenesis in eukaryotes              | 210 (2.1%)                                   | ko03008    |
| 13     | Ubiquitin mediated proteolysis                 | 207 (2.07%)                                  | ko04120    |
| 14     | RNA degradation                                | 199 (1.99%)                                  | ko03018    |
| 15     | mRNA surveillance pathway                      | 196 (1.96%)                                  | ko03015    |
| 16     | Pyrimidine metabolism                          | 191 (1.91%)                                  | ko00240    |
| 17     | Glycolysis/Gluconeogenesis                     | 180 (1.8%)                                   | ko00010    |
| 18     | Amino sugar and nucleotide<br>sugar metabolism | 168 (1.68%)                                  | ko00520    |
| 19     | Glycerophospholipid metabolism                 | 139 (1.39%)                                  | ko00564    |
| 20     | Carbon fixation in<br>photosynthetic organisms | 136 (1.36%)                                  | ko00710    |
| 21     | Endocytosis                                    | 135 (1.35%)                                  | ko04144    |
| 22     | Peroxisome                                     | 133 (1.33%)                                  | ko04146    |
| 23     | Phagosome                                      | 128 (1.28%)                                  | ko04145    |
| 24     | Glycine, serine and<br>threonine metabolism    | 122 (1.22%)                                  | ko00260    |
| 25     | Cysteine and methionine metabolism             | 118 (1.18%)                                  | ko00270    |
| 26     | Pyruvate metabolism                            | 115 (1.15%)                                  | ko00620    |

Table S1. *Cont.*

| Number | Pathway                                                | All Genes with Pathway Annotation<br>(10002) | Pathway<br>ID |
|--------|--------------------------------------------------------|----------------------------------------------|---------------|
| 27     | Aminoacyl-tRNA biosynthesis                            | 109 (1.09%)                                  | ko00970       |
| 28     | Nucleotide excision repair                             | 108 (1.08%)                                  | ko03420       |
| 29     | Arginine and proline metabolism                        | 104 (1.04%)                                  | ko00330       |
| 30     | Phenylpropanoid biosynthesis                           | 102 (1.02%)                                  | ko00940       |
| 31     | Glutathione metabolism                                 | 102 (1.02%)                                  | ko00480       |
| 32     | Homologous recombination                               | 95 (0.95%)                                   | ko03440       |
| 33     | Glyoxylate and<br>dicarboxylate metabolism             | 94 (0.94%)                                   | ko00630       |
| 34     | Basal transcription factors                            | 90 (0.9%)                                    | ko03022       |
| 35     | Pentose phosphate pathway                              | 89 (0.89%)                                   | ko00030       |
| 36     | Inositol phosphate metabolism                          | 87 (0.87%)                                   | ko00562       |
| 37     | Fructose and mannose metabolism                        | 87 (0.87%)                                   | ko00051       |
| 38     | Porphyrin and chlorophyll metabolism                   | 83 (0.83%)                                   | ko00860       |
| 39     | Photosynthesis                                         | 83 (0.83%)                                   | ko00195       |
| 40     | Glycerolipid metabolism                                | 81 (0.81%)                                   | ko00561       |
| 41     | N-Glycan biosynthesis                                  | 80 (0.8%)                                    | ko00510       |
| 42     | Base excision repair                                   | 79 (0.79%)                                   | ko03410       |
| 43     | Protein export                                         | 78 (0.78%)                                   | ko03060       |
| 44     | Phosphatidylinositol signaling system                  | 78 (0.78%)                                   | ko04070       |
| 45     | Pentose and<br>glucuronate interconversions            | 78 (0.78%)                                   | ko00040       |
| 46     | RNA polymerase                                         | 76 (0.76%)                                   | ko03020       |
| 47     | Valine, leucine and<br>isoleucine degradation          | 75 (0.75%)                                   | ko00280       |
| 48     | DNA replication                                        | 74 (0.74%)                                   | ko03030       |
| 49     | Terpenoid backbone biosynthesis                        | 72 (0.72%)                                   | ko00900       |
| 50     | Galactose metabolism                                   | 72 (0.72%)                                   | ko00052       |
| 51     | Alanine, aspartate and<br>glutamate metabolism         | 71 (0.71%)                                   | ko00250       |
| 52     | Citrate cycle (TCA cycle)                              | 71 (0.71%)                                   | ko00020       |
| 53     | Mismatch repair                                        | 69 (0.69%)                                   | ko03430       |
| 54     | Proteasome                                             | 69 (0.69%)                                   | ko03050       |
| 55     | Phenylalanine, tyrosine and<br>tryptophan biosynthesis | 68 (0.68%)                                   | ko00400       |
| 56     | Valine, leucine and<br>isoleucine biosynthesis         | 68 (0.68%)                                   | ko00290       |
| 57     | Nitrogen metabolism                                    | 67 (0.67%)                                   | ko00910       |
| 58     | Phenylalanine metabolism                               | 67 (0.67%)                                   | ko00360       |
| 59     | Fatty acid metabolism                                  | 64 (0.64%)                                   | ko00071       |
| 60     | Ubiquinone and other<br>terpenoid-quinone biosynthesis | 63 (0.63%)                                   | ko00130       |
| 61     | alpha-Linolenic acid metabolism                        | 59 (0.59%)                                   | ko00592       |
| 62     | Ascorbate and aldarate metabolism                      | 57 (0.57%)                                   | ko00053       |

Table S1. *Cont.*

| Number | Pathway                                                | All Genes with Pathway Annotation<br>(10002) | Pathway<br>ID |
|--------|--------------------------------------------------------|----------------------------------------------|---------------|
| 63     | SNARE interactions in vesicular transport              | 57 (0.57%)                                   | ko04130       |
| 64     | Pantothenate and CoA biosynthesis                      | 55 (0.55%)                                   | ko00770       |
| 65     | Cyanoamino acid metabolism                             | 54 (0.54%)                                   | ko00460       |
| 66     | Glycosylphosphatidylinositol-anchor biosynthesis       | 53 (0.53%)                                   | ko00563       |
| 67     | $\beta$ -Alanine metabolism                            | 53 (0.53%)                                   | ko00410       |
| 68     | Tyrosine metabolism                                    | 53 (0.53%)                                   | ko00350       |
| 69     | Fatty acid biosynthesis                                | 51 (0.51%)                                   | ko00061       |
| 70     | Ether lipid metabolism                                 | 50 (0.5%)                                    | ko00565       |
| 71     | Natural killer cell mediated cytotoxicity              | 49 (0.49%)                                   | ko04650       |
| 72     | Biosynthesis of unsaturated fatty acids                | 49 (0.49%)                                   | ko01040       |
| 73     | Propanoate metabolism                                  | 48 (0.48%)                                   | ko00640       |
| 74     | Carotenoid biosynthesis                                | 46 (0.46%)                                   | ko00906       |
| 75     | Sphingolipid metabolism                                | 45 (0.45%)                                   | ko00600       |
| 76     | Sulfur metabolism                                      | 44 (0.44%)                                   | ko00920       |
| 77     | One carbon pool by folate                              | 43 (0.43%)                                   | ko00670       |
| 78     | Circadian rhythm-plant                                 | 43 (0.43%)                                   | ko04712       |
| 79     | Photosynthesis-antenna proteins                        | 41 (0.41%)                                   | ko00196       |
| 80     | Histidine metabolism                                   | 38 (0.38%)                                   | ko00340       |
| 81     | Folate biosynthesis                                    | 36 (0.36%)                                   | ko00790       |
| 82     | Regulation of autophagy                                | 35 (0.35%)                                   | ko04140       |
| 83     | Selenocompound metabolism                              | 34 (0.34%)                                   | ko00450       |
| 84     | Diterpenoid biosynthesis                               | 32 (0.32%)                                   | ko00904       |
| 85     | Steroid biosynthesis                                   | 30 (0.3%)                                    | ko00100       |
| 86     | Flavonoid biosynthesis                                 | 29 (0.29%)                                   | ko00941       |
| 87     | Linoleic acid metabolism                               | 29 (0.29%)                                   | ko00591       |
| 88     | Tropane, piperidine and pyridine alkaloid biosynthesis | 29 (0.29%)                                   | ko00960       |
| 89     | Limonene and pinene degradation                        | 27 (0.27%)                                   | ko00903       |
| 90     | Fatty acid elongation in mitochondria                  | 27 (0.27%)                                   | ko00062       |
| 91     | Isoquinoline alkaloid biosynthesis                     | 26 (0.26%)                                   | ko00950       |
| 92     | Tryptophan metabolism                                  | 26 (0.26%)                                   | ko00380       |
| 93     | Nicotinate and nicotinamide metabolism                 | 26 (0.26%)                                   | ko00760       |
| 94     | Glycosphingolipid biosynthesis-globo series            | 25 (0.25%)                                   | ko00603       |
| 95     | Lysine degradation                                     | 24 (0.24%)                                   | ko00310       |
| 96     | Stilbenoid, diarylheptanoid and gingerol biosynthesis  | 23 (0.23%)                                   | ko00945       |
| 97     | Lysine biosynthesis                                    | 23 (0.23%)                                   | ko00300       |
| 98     | Butanoate metabolism                                   | 22 (0.22%)                                   | ko00650       |
| 99     | Glycosaminoglycan degradation                          | 21 (0.21%)                                   | ko00531       |
| 100    | Other glycan degradation                               | 21 (0.21%)                                   | ko00511       |
| 101    | Sulfur relay system                                    | 21 (0.21%)                                   | ko04122       |

Table S1. *Cont.*

| Number | Pathway                                          | All Genes with Pathway Annotation<br>(10002) | Pathway<br>ID |
|--------|--------------------------------------------------|----------------------------------------------|---------------|
| 102    | Zeatin biosynthesis                              | 20 (0.2%)                                    | ko00908       |
| 103    | Thiamine metabolism                              | 19 (0.19%)                                   | ko00730       |
| 104    | Riboflavin metabolism                            | 19 (0.19%)                                   | ko00740       |
| 105    | Circadian rhythm-mammal                          | 18 (0.18%)                                   | ko04710       |
| 106    | Flavone and flavonol biosynthesis                | 17 (0.17%)                                   | ko00944       |
| 107    | Non-homologous end-joining                       | 15 (0.15%)                                   | ko03450       |
| 108    | Arachidonic acid metabolism                      | 14 (0.14%)                                   | ko00590       |
| 109    | Monoterpenoid biosynthesis                       | 14 (0.14%)                                   | ko00902       |
| 110    | Glucosinolate biosynthesis                       | 13 (0.13%)                                   | ko00966       |
| 111    | Brassinosteroid biosynthesis                     | 13 (0.13%)                                   | ko00905       |
| 112    | Vitamin B6 metabolism                            | 12 (0.12%)                                   | ko00750       |
| 113    | Taurine and hypotaurine metabolism               | 10 (0.1%)                                    | ko00430       |
| 114    | C5-Branched dibasic acid metabolism              | 9 (0.09%)                                    | ko00660       |
| 115    | Lipoic acid metabolism                           | 8 (0.08%)                                    | ko00785       |
| 116    | Synthesis and degradation of<br>ketone bodies    | 7 (0.07%)                                    | ko00072       |
| 117    | Glycosphingolipid<br>biosynthesis-ganglio series | 6 (0.06%)                                    | ko00604       |
| 118    | Sesquiterpenoid biosynthesis                     | 6 (0.06%)                                    | ko00909       |
| 119    | Other types of <i>O</i> -glycan biosynthesis     | 4 (0.04%)                                    | ko00514       |
| 120    | Caffeine metabolism                              | 4 (0.04%)                                    | ko00232       |
| 121    | ABC transporters                                 | 3 (0.03%)                                    | ko02010       |
| 122    | Biotin metabolism                                | 3 (0.03%)                                    | ko00780       |
| 123    | Indole alkaloid biosynthesis                     | 2 (0.02%)                                    | ko00901       |
| 124    | Anthocyanin biosynthesis                         | 1 (0.01%)                                    | ko00942       |

**Table S2.** *T. sinense* unigenes that share homology with flower develop genes.

| Gene ID        | Annotation                                                                                                                                                                                    | Annotation Databases | E-Value                 |
|----------------|-----------------------------------------------------------------------------------------------------------------------------------------------------------------------------------------------|----------------------|-------------------------|
| Unigene0044321 | Circadian clock-associated Flavin-binding, kelch repeat, F-box (FKF1) [ <i>Glycine max</i> ]                                                                                                  | Nr (Non redundant)   | 0                       |
| Unigene0015678 | Early flowering -like 4 [ <i>Theobroma cacao</i> ]                                                                                                                                            | Nr                   | $2.00 \times 10^{-53}$  |
| Unigene0017570 | Flowering locus C [ <i>Betula platyphylla</i> ]                                                                                                                                               | Nr                   | $2.00 \times 10^{-14}$  |
| Unigene0017571 | Flowering locus C [ <i>Vitis vinifera</i> ]                                                                                                                                                   | Nr                   | $2.00 \times 10^{-23}$  |
| Unigene0010567 | Flowering locus T protein [ <i>Betula platyphylla</i> ]                                                                                                                                       | Nr                   | $3.00 \times 10^{-43}$  |
| Unigene0030535 | Flowering time control protein abscisic acid receptor (FCA)<br>Organism species (OS) = <i>Arabidopsis thaliana</i><br>Gene name(GN) = FCA Protein Existence (PE) = 1 SequenceVersion (SV) = 2 | Swissprot            | $5.00 \times 10^{-24}$  |
| Unigene0023453 | Flowering time control protein autonomous-pathway component (FPA)<br>OS = <i>Arabidopsis thaliana</i> GN = FPA PE = 2 SV = 2                                                                  | Swissprot            | $2.00 \times 10^{-121}$ |
| Unigene0015676 | Flowering-promoting factor 1-like protein 1 Organism species (OS) = <i>Arabidopsis thaliana</i><br>GN = Flowering-promoting factor 1 (FLP1) PE = 2 SV = 2                                     | Swissprot            | $4.00 \times 10^{-25}$  |
| Unigene0023748 | Flowering-related B-class MADS (acronym referring to MCM1, AGAMOUS, DEFICIENS, SRF)-box protein [ <i>Vitis vinifera</i> ]                                                                     | Nr                   | $1.00 \times 10^{-95}$  |
| Unigene0015337 | K-box region and MADS-box transcription factor family protein [ <i>Theobroma cacao</i> ]                                                                                                      | Nr                   | $9.00 \times 10^{-67}$  |
| Unigene0020944 | K-box region and MADS-box transcription factor family protein isoform 1 [ <i>Theobroma cacao</i> ]                                                                                            | Nr                   | $1.00 \times 10^{-34}$  |
| Unigene0014037 | MADS box transcription factor [ <i>Elaeis guineensis</i> ]                                                                                                                                    | Nr                   | $2.00 \times 10^{-34}$  |
| Unigene0001006 | MADS box transcription factor [ <i>Populus tomentosa</i> ]                                                                                                                                    | Nr                   | $9.00 \times 10^{-74}$  |
| Unigene0014036 | MADS1 [ <i>Carica papaya</i> ]                                                                                                                                                                | Nr                   | $4.00 \times 10^{-81}$  |
| Unigene0009074 | MADS-box domain protein [ <i>Camellia sinensis</i> ]                                                                                                                                          | Nr                   | $2.00 \times 10^{-52}$  |
| Unigene0026147 | MADS-box protein 3 [ <i>Vitis vinifera</i> ]                                                                                                                                                  | Nr                   | $2.00 \times 10^{-38}$  |
| Unigene0007436 | MADS-box protein AGL15 [ <i>Dimocarpus longan</i> ]                                                                                                                                           | Nr                   | $1.00 \times 10^{-77}$  |
| Unigene0017569 | MADS-box protein FLOWERING LOCUS C,<br>Organism species (OS) = <i>Arabidopsis thaliana</i> GN = FLC PE = 2 SV = 1                                                                             | Swissprot            | $1.00 \times 10^{-38}$  |
| Unigene0041794 | MADS-box protein SEP2B [ <i>Aquilegia coerulea</i> ]                                                                                                                                          | Nr                   | $9.00 \times 10^{-26}$  |
| Unigene0026533 | MADS-box protein suppressor of overexpression of constans 1 (SOC1),<br>Organism species (OS) = <i>Arabidopsis thaliana</i> GN = SOC1 PE = 1 SV = 1                                            | Swissprot            | $5.00 \times 10^{-78}$  |

Table S2. Cont.

| Gene ID        | Annotation                                                                                                                   | Annotation Databases | E-Value                 |
|----------------|------------------------------------------------------------------------------------------------------------------------------|----------------------|-------------------------|
| Unigene0005810 | MADS-box protein SVP OS = <i>Arabidopsis thaliana</i> GN = Short vegetative phase (SVP) PE = 1 SV = 1                        | Swissprot            | $3.00 \times 10^{-73}$  |
| Unigene0021685 | MADS-box transcription factor 16 OS = <i>Oryza sativa</i> subsp. <i>japonica</i>                                             | Swissprot            | $2.00 \times 10^{-15}$  |
| Unigene0001644 | MADS-box transcription factor 27 OS = <i>Oryza sativa</i> subsp. <i>Japonica</i>                                             | Swissprot            | $4.00 \times 10^{-7}$   |
| Unigene0008775 | Pedicel, carpel, stamen, petal differentiation and expansion stage, group 2-like protein [ <i>Theobroma cacao</i> ]          | Nr                   | $1.00 \times 10^{-79}$  |
| Unigene0005239 | Phytochrome and flowering time regulatory protein isoform 2 [ <i>Theobroma cacao</i> ]                                       | Nr                   | $1.00 \times 10^{-24}$  |
| Unigene0041805 | PREDICTED: MADS-box protein calmodulin binding 1 (CMB1) isoform 2 [ <i>Vitis vinifera</i> ]                                  | Nr                   | $4.00 \times 10^{-55}$  |
| Unigene0016170 | PREDICTED: MADS-box protein SVP [ <i>Vitis vinifera</i> ]                                                                    | Nr                   | $2.00 \times 10^{-55}$  |
| Unigene0049385 | Protein EARLY FLOWERING 3, Organism species (OS) = <i>Arabidopsis thaliana</i><br>GN = EARLY FLOWERING 3(ELF3) PE = 1 SV = 1 | Swissprot            | $8.00 \times 10^{-130}$ |
| Unigene0017817 | Protein EARLY FLOWERING 4 OS = <i>Arabidopsis thaliana</i> GN = ELF4 PE = 1 SV = 1                                           | Swissprot            | $1.00 \times 10^{-27}$  |
| Unigene0003399 | Sex determination protein tasselseed-2 OS = <i>Zea mays</i> GN = tasselseed-2 (TS2) PE = 2 SV = 1                            | Swissprot            | $8.00 \times 10^{-59}$  |
| Unigene0021451 | Uncharacterized protein involved in cell differentiation/sexual development                                                  | COG                  | $2.00 \times 10^{-24}$  |
